# Supplementary material for: Genome-Wide Analysis of Auxin Receptor Family Genes in Brassica juncea var. tumida
Source: MDPI journal article supplement (doi:10.3390/genes10020165), 2019-02-20
Supplement: s1 [file s1]

**Table S1 Primers used for qPCR in this study**

| <b>Primer Name</b> | <b>Sequence</b>        |
|--------------------|------------------------|
| qRT-BjuTIR1A-F     | TGTATAAGCGAGTGTCCCTA   |
| qRT-BjuTIR1A-R     | ATTTGCAGACCAGAGAGACG   |
| qRT-BjuTIR1B-F     | TGTATAAGCGAGTGGCCTTA   |
| qRT-BjuTIR1B-R     | ACTTGCAGACAAGGGACACA   |
| qRT-BjuTIR1C-F     | CAGAAGCGAATCGGCCTC     |
| qRT-BjuTIR1C-R     | ATTTGCAGACGAGGGAAACG   |
| qRT-BjuTIR1D-F     | TGTATAAGCGAGTGGGGCTG   |
| qRT-BjuTIR1D-R     | ACTTGCACACCAGAGACACC   |
| qRT-BjuTIR1E-F     | TGTATAAGCGAGTGTCTGTTA  |
| qRT-BjuTIR1E-R     | ACTTGCACACCAGGGACACC   |
| qRT-BjuTIR1F-F     | TGCAGAAGCGAGTGGTGTG    |
| qRT-BjuTIR1F-R     | ACTTGCAGACGAGAGACACG   |
| qRT- BjuAFB1A-F    | GAAGATGCCAAGGCTTAAC    |
| qRT- BjuAFB1A-R    | CAAACCTCAGGCGTATCCAAC  |
| qRT- BjuAFB1B-F    | CAAAGGTTCTTGAGCACATCT  |
| qRT- BjuAFB1B-R    | GACGTGCAACCGCTGCG      |
| qRT- BjuAFB1C-F    | CTAAGGTTCTTGAGCATATCC  |
| qRT- BjuAFB1C-R    | GTGCAACCGCCTCAGGGG     |
| qRT- BjuAFB1D -F   | GAAGATGCCGAGGCTAAAT    |
| qRT- BjuAFB1D-R    | CAAACCTCAGGCGTATCCTGC  |
| qRT- BjuAFB2 -F    | GAACGATAATAACCGTATGGA  |
| qRT- BjuAFB2-R     | AACGGCGGCGCATCAACC     |
| qRT- BjuAFB3A-F    | GAATGAGAATGAGAATGGGAG  |
| qRT- BjuAFB3A -R   | GTCCCTTCTAGTCCCAACACG  |
| qRT- BjuAFB3B-F    | GAGAATGAGAGTGGGAGGA    |
| qRT- BjuAFB3B-R    | CCATTCTAGTCCCAACGACC   |
| qRT- BjuAFB3C-F    | CCCAGACGAGGTGATTGAG    |
| qRT- BjuAFB3C-R    | GAACACTCTCTTCCTGCTACAC |
| qRT- BjuAFB3D-F    | GATCGAGAGATCGTTGACTC   |
| qRT- BjuAFB3D-R    | GCGTGCCTTAGCTAACGCAT   |
| qRT- BjuAFB4-F     | TCGGAGATGGCCAAGAACGTC  |
| qRT- BjuAFB4-R     | ACATATGCTGATGCTACGGG   |
| qRT- BjuAFB5A-F    | GGTGCATCGCCTGCTACTTG   |
| qRT- BjuAFB5A-R    | CAGGTTCTTGCTCGCTCTGA   |
| qRT- BjuAFB5B-F    | GCTACGTCGCCTCCTGCTGC   |
| qRT- BjuAFB5B-R    | CGGTCCCTGCTCGTCGCTC    |
| qRT-BjuACTIN3-F    | GGCTACTCTTTACCACGAC    |
| qRT-BjuACTIN3-R    | GGATACCAGCATTCTCCATAC  |

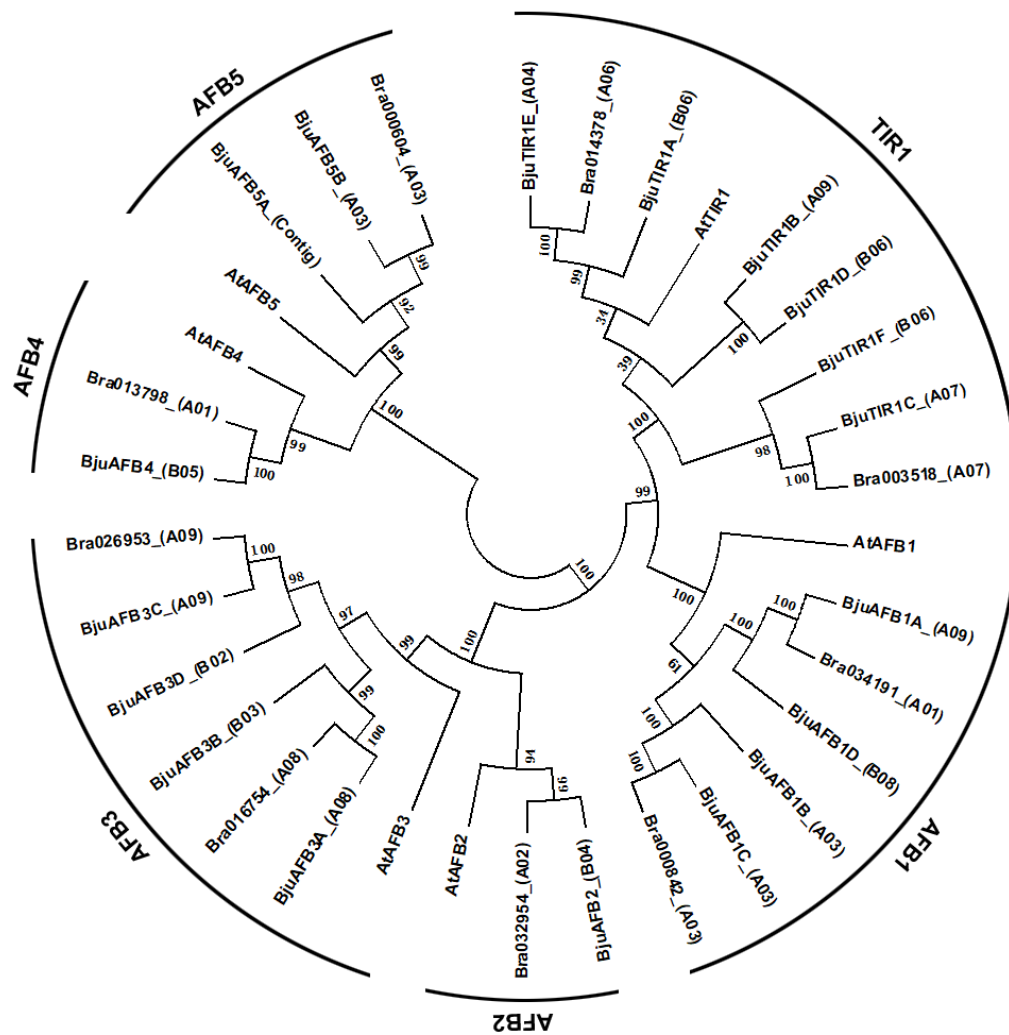

**Figure S3.** The phylogenetic analysis of TIR1/AFBs in *A. thaliana*, *B. rapa* and *B. juncea* var. *tumida*. The protein sequence of each gene was used for the alignment, and the phylogenetic neighbor-joining tree was constructed using MEGA5 phylogenetic analysis software.

## File S4 The raw data of qPCR assays

### qPCR in tissues-raw data of three biological repeats

| Sample       | TIR1A | TIR1B | TIR1C | TIR1D | TIR1E | TIR1F | AFB1A | AFB1B | AFB1C | AFB1D | AFB2  | AFB3A | AFB3B | AFB3C | AFB3D | AFB4  | AFB5A | AFB5B | ACTIN |
|--------------|-------|-------|-------|-------|-------|-------|-------|-------|-------|-------|-------|-------|-------|-------|-------|-------|-------|-------|-------|
| Root         | 29.67 | 18.41 | 10.74 | 7.1   | 11.8  | 17.96 | 12.68 | 12.3  | 14.46 | 32.3  | 25.5  | 11    | 15.36 | 29.68 | 22.38 | 14.29 | 20.44 | 12.38 | 16.86 |
|              | 8.62  | 19.2  | 12.23 | 7.67  | 14.6  | 33.06 | 14.75 | 9.64  | 12.95 | 22.96 | 24.27 | 11.57 | 21.84 | 11    | 27.49 | 18.95 | 19.22 | 14.87 | 16.37 |
|              | 7.2   | 26.6  | 13.14 | 6.98  | 17.7  | 29.31 | 12.43 | 10.15 | 13.66 | 19.79 | 25.2  | 7.28  | 22.15 | 13.11 | 21.91 | 20.13 | 17.57 | 17.28 | 18.62 |
| Stem         | 31.16 | 21.6  | 11.67 | 10.47 | 12.43 | 18.41 | 16.26 | 33.96 | 14.35 | 22.75 | 23.7  | 8.26  | 17.95 | 11.12 | 23.86 | 17.56 | 24.06 | 18.93 | 19.73 |
|              | 8.3   | 19.02 | 12.38 | 8.25  | 15.38 | 14.99 | 19.79 | 10.23 | 12.25 | 21.22 | 22.4  | 9.32  | 18.8  | 14.44 | 23.81 | 37.66 | 21.25 | 16.76 | 21.05 |
|              | 9.48  | 20.45 | 12.85 | 8.74  | 14.8  | 15.89 | 17.47 | 9.86  | 17.81 | 22.73 | 22.5  | 8.34  | 16.63 | 11.43 | 23.68 | 17.47 | 17    | 17.56 | 21.75 |
| Leaf         | 27.77 | 20.48 | 15.29 | 8.87  | 18.27 | 19.67 | 16.24 | 10.6  | 13.74 | 24.12 | 24.77 | 25.92 | 18.76 | 14.71 | 27.81 | 19.16 | 19.86 | 15.99 | 19.88 |
|              | 29.26 | 21.68 | 13.19 | 11.42 | 14.78 | 18.92 | 16.32 | 14.28 | 18.18 | 20.45 | 25.43 | 10.19 | 18.63 | 17.32 | 23.18 | 22.05 | 22.45 | 17.91 | 18.96 |
|              | 10.63 | 21.52 | 17.77 | 7.44  | 14.38 | 16.99 | 15.56 | 12.96 | 15.26 | 20.28 | 24.18 | 25.09 | 16.87 | 12.88 | 25.39 | 32.25 | 20.47 | 18.75 | 18.88 |
| Flower       | 9.95  | 19.76 | 19.85 | 14.65 | 15.31 | 16.45 | 18.85 | 11.72 | 20.14 | 24.91 | 24.75 | 23.83 | 18.59 | 15.13 | 19.56 | 18.33 | 21.64 | 24.58 | 22.58 |
|              | 8.98  | 21.45 | 13.87 | 14.36 | 17.97 | 22.02 | 18    | 16.51 | 16.19 | 25.82 | 24.4  | 10.64 | 25.32 | 13.09 | 24.35 | 18.86 | 21.53 | 19.45 | 21.69 |
|              | 10.72 | 23.66 | 19.12 | 10.89 | 15.61 | 17.79 | 22.1  | 14.5  | 16.84 | 24.95 | 24.1  | 24.26 | 24.71 | 15.27 | 22.71 | 27.49 | 25.99 | 19.58 | 22.38 |
| Pod          | 27.93 | 19.79 | 13.29 | 12.13 | 16.49 | 15.82 | 19.82 | 11.76 | 16.12 | 25.85 | 25.71 | 13.28 | 19.91 | 13.25 | 27.84 | 21.31 | 22.36 | 19.98 | 23.73 |
|              | 27.28 | 27.86 | 15.63 | 11.11 | 15.98 | 14.66 | 28.79 | 26.95 | 16.27 | 25.27 | 26.69 | 10.27 | 19.66 | 17.11 | 30.69 | 19.16 | 22.95 | 25.76 | 24.45 |
|              | 11.48 | 21.24 | 25.95 | 11.62 | 17.81 | 17.59 | 18.72 | 10.74 | 17.15 | 24.31 | 25.69 | 12.04 | 21.53 | 11.92 | 27.82 | 21.38 | 28.09 | 20.06 | 24.53 |
| Swollen stem | 12.52 | 25.3  | 17.92 | 15.97 | 16.85 | 24.92 | 22.73 | 17.27 | 31.24 | 29.12 | 25.87 | 14.53 | 25.59 | 26.35 | 31.38 | 23.75 | 30    | 27.64 | 24.71 |
|              | 13.93 | 29.37 | 17.27 | 13.92 | 18.7  | 27.24 | 25.72 | 15.76 | 29.15 | 29.24 | 25.8  | 14.44 | 26.37 | 26.12 | 30.73 | 22.97 | 27.82 | 27.2  | 24.38 |
|              | 13.15 | 26.21 | 24.41 | 14.5  | 18.64 | 21.46 | 27.99 | 14.65 | 28.53 | 29.18 | 25.96 | 14.85 | 26.69 | 22.15 | 32.3  | 29.07 | 28.6  | 27.58 | 24.37 |

qPCR in tissues-modified data used for analysis

| Sample  | TIR1A | TIR1B | TIR1C | TIR1D | TIR1E | TIR1F | AFB1A | AFB1B | AFB1C | AFB1D | AFB2  | AFB3A | AFB3B | AFB3C | AFB3D | AFB4  | AFB5A | AFB5B | ACTIN |
|---------|-------|-------|-------|-------|-------|-------|-------|-------|-------|-------|-------|-------|-------|-------|-------|-------|-------|-------|-------|
| Root    |       | 18.41 |       | 7.1   | 11.8  |       | 12.68 |       | 14.46 |       | 25.5  | 11    |       |       | 22.38 |       | 20.44 | 12.38 | 16.86 |
|         | 8.62  | 19.2  | 12.23 | 7.67  | 14.6  | 33.06 |       | 9.64  | 12.95 | 22.96 | 24.27 | 11.57 | 21.84 | 11    |       | 18.95 | 19.22 | 14.87 | 16.37 |
|         | 7.2   |       | 13.14 | 6.98  | 17.7  | 29.31 | 12.43 | 10.15 | 13.66 | 19.79 | 25.2  |       | 22.15 | 13.11 | 21.91 | 20.13 |       |       | 18.62 |
| Stem    |       | 21.6  | 11.67 |       |       |       | 16.26 |       | 14.35 | 22.75 | 23.7  | 8.26  | 17.95 | 11.12 | 23.86 | 17.56 | 24.06 | 18.93 | 19.73 |
|         | 8.3   | 19.02 | 12.38 | 8.25  | 15.38 | 14.99 |       | 10.23 | 12.25 | 21.22 | 22.4  | 9.32  | 18.8  |       | 23.81 |       | 21.25 | 16.76 | 21.05 |
|         | 9.48  | 20.45 | 12.85 | 8.74  | 14.8  | 15.89 | 17.47 | 9.86  |       | 22.73 | 22.5  | 8.34  | 16.63 | 11.43 | 23.68 | 17.47 |       | 17.56 | 21.75 |
| Leaf    | 27.77 | 20.48 | 15.29 | 8.87  |       | 19.67 | 16.24 | 10.6  | 13.74 |       | 24.77 | 25.92 | 18.76 | 14.71 | 27.81 | 19.16 | 19.86 | 15.99 | 19.88 |
|         | 29.26 | 21.68 | 13.19 |       | 14.78 | 18.92 | 16.32 | 14.28 |       | 20.45 | 25.43 |       | 18.63 |       | 23.18 | 22.05 |       | 17.91 | 18.96 |
|         |       | 21.52 | 17.77 | 7.44  | 14.38 | 16.99 | 15.56 | 12.96 | 15.26 | 20.28 | 24.18 | 25.09 |       | 12.88 | 25.39 |       | 20.47 | 18.75 | 18.88 |
| Flower  | 9.95  | 19.76 | 19.85 | 14.65 | 15.31 | 16.45 | 18.85 |       |       | 24.91 | 24.75 | 23.83 |       | 15.13 |       | 18.33 | 21.64 |       | 22.58 |
|         | 8.98  | 21.45 |       | 14.36 |       |       | 18    | 16.51 | 16.19 | 25.82 | 24.4  |       | 25.32 |       | 24.35 | 18.86 | 21.53 | 19.45 | 21.69 |
|         | 10.72 | 23.66 | 19.12 |       | 15.61 | 17.79 |       | 14.5  | 16.84 | 24.95 | 24.1  | 24.26 | 24.71 | 15.27 | 22.71 |       |       | 19.58 | 22.38 |
| Pod     | 27.93 | 19.79 | 13.29 | 12.13 | 16.49 | 15.82 | 19.82 | 11.76 | 16.12 | 25.85 | 25.71 | 13.28 | 19.91 | 13.25 | 27.84 | 21.31 | 22.36 | 19.98 | 23.73 |
|         | 27.28 |       | 15.63 | 11.11 | 15.98 | 14.66 |       |       | 16.27 | 25.27 | 26.69 |       | 19.66 |       |       |       | 22.95 |       | 24.45 |
|         |       | 21.24 |       | 11.62 | 17.81 |       | 18.72 | 10.74 | 17.15 | 24.31 | 25.69 | 12.04 |       | 11.92 | 27.82 | 21.38 |       | 20.06 | 24.53 |
| Swollen | 12.52 | 25.3  | 17.92 | 15.97 |       | 24.92 |       |       |       | 29.12 | 25.87 | 14.53 | 25.59 | 26.35 | 31.38 | 23.75 |       | 27.64 | 24.71 |
| stem    | 13.93 |       | 17.27 | 13.92 | 18.7  | 27.24 | 25.72 | 15.76 | 29.15 | 29.24 | 25.8  | 14.44 | 26.37 | 26.12 | 30.73 | 22.97 | 27.82 | 27.2  | 24.38 |
|         | 13.15 | 26.21 |       | 14.5  | 18.64 | 21.46 | 27.99 | 14.65 | 28.53 | 29.18 | 25.96 | 14.85 | 26.69 | 22.15 | 32.3  |       | 28.6  | 27.58 | 24.37 |

qPCR under salt treatment-raw data of three biological repeats

| Sample   | TIR1A | TIR1B | TIR1C | TIR1D | TIR1E | TIR1F | AFB1A | AFB1B | AFB1C | AFB1D | AFB2  | AFB3A | AFB3B | AFB3C | AFB3D | AFB4  | AFB5A | AFB5B | ACTIN |
|----------|-------|-------|-------|-------|-------|-------|-------|-------|-------|-------|-------|-------|-------|-------|-------|-------|-------|-------|-------|
| CK       | 14.43 | 19.07 | 11.86 | 8.72  | 11.83 | 17.76 | 13.33 | 9.64  | 16.43 | 19.03 | 19.68 | 8.5   | 16.24 | 10.4  | 19.71 | 14.64 | 19.98 | 18.58 | 19.16 |
|          | 16.69 | 19.49 | 13.6  | 7.78  | 11.47 | 16.76 | 14.76 | 9.41  | 15.48 | 18.12 | 19.57 | 8.14  | 14.2  | 11    | 26.34 | 13.88 | 20.65 | 21.45 | 20.47 |
|          | 8.5   | 18.79 | 11.39 | 7.51  | 11.6  | 19.07 | 13.06 | 11.59 | 13    | 20.22 | 19.82 | 7.32  | 14.45 | 10.63 | 18.73 | 13.69 | 21.11 | 19.12 | 20.32 |
| NaCl-3h  | 8.65  | 16.79 | 13.76 | 11.76 | 13.78 | 17.63 | 17.75 | 15.57 | 15.33 | 20.49 | 21.44 | 8.71  | 17.82 | 14.16 | 21.17 | 19.22 | 19.65 | 17.81 | 19.6  |
|          | 9.3   | 19.72 | 13.67 | 7.86  | 13.38 | 16.81 | 16.2  | 11.29 | 15.97 | 26.24 | 20.2  | 9.98  | 16.97 | 13.22 | 19.82 | 16.76 | 20.17 | 19.45 | 20.54 |
|          | 10.65 | 16.98 | 13.74 | 10.44 | 12.29 | 17.42 | 17.7  | 23.06 | 14.21 | 24.99 | 21.72 | 11.16 | 15.9  | 11.2  | 25.69 | 17.84 | 20.36 | 17.86 | 22.63 |
| NaCl-6h  | 9     | 19.73 | 15.8  | 10.26 | 14.47 | 19.06 | 18.34 | 18.66 | 14.85 | 25.68 | 22.67 | 11.92 | 19.13 | 18.82 | 20.6  | 19.95 | 20.34 | 19.49 | 21.45 |
|          | 11.04 | 21.2  | 14.3  | 10.96 | 17.1  | 18.55 | 15.92 | 12.09 | 15.42 | 25.69 | 22.63 | 10.89 | 22.88 | 14.75 | 26.21 | 20.31 | 21.72 | 20.75 | 21.92 |
|          | 10.54 | 20.65 | 13.81 | 10.77 | 14.37 | 18.49 | 22.02 | 16.31 | 14.33 | 24.97 | 21.81 | 12.23 | 17.79 | 14.28 | 35.17 | 17.81 | 22.67 | 19.21 | 23.24 |
| NaCl-12h | 17.59 | 21.54 | 19.06 | 11.74 | 15.54 | 20.69 | 18.57 | 13.69 | 22.12 | 25.39 | 21.83 | 12.56 | 17.7  | 10.93 | 22.97 | 20.3  | 24.16 | 21.11 | 22.15 |
|          | 11.95 | 21.88 | 15.42 | 12.44 | 15.76 | 19.6  | 17.97 | 16.97 | 17.67 | 24.44 | 21.35 | 11.74 | 20.87 | 15.24 | 20.43 | 20.74 | 23.33 | 22.17 | 22.3  |
|          | 16.12 | 19.66 | 16.97 | 15.62 | 14.29 | 20.6  | 20.59 | 20.88 | 15.44 | 24.04 | 21.97 | 10.18 | 17.96 | 18.6  | 23.64 | 20.49 | 26.37 | 22.22 | 22.08 |
| NaCl-24h | 14.93 | 19.95 | 18.62 | 13.85 | 16.99 | 19.36 | 21.78 | 18.34 | 19.67 | 26.7  | 23.25 | 14.54 | 21.65 | 15.95 | 26.36 | 21.21 | 26.8  | 25.4  | 22.89 |
|          | 14.92 | 22.4  | 27.24 | 13.63 | 15.92 | 22.25 | 24.92 | 17.36 | 21.17 | 26.29 | 24.18 | 14.98 | 20.1  | 23.77 | 27.8  | 22.65 | 24.73 | 23.36 | 22.83 |
|          | 14.94 | 22.75 | 19.32 | 12    | 18.23 | 22.79 | 22.72 | 15.46 | 23.33 | 25.6  | 23.71 | 14.82 | 19.95 | 19.15 | 28.36 | 25.46 | 25.65 | 24.88 | 22.87 |

qPCR under salt treatment-modified data used for analysis

| Sample   | TIR1A | TIR1B | TIR1C | TIR1D | TIR1E | TIR1F | AFB1A | AFB1B | AFB1C | AFB1D | AFB2  | AFB3A | AFB3B | AFB3C | AFB3D | AFB4  | AFB5A | AFB5B | ACTIN |
|----------|-------|-------|-------|-------|-------|-------|-------|-------|-------|-------|-------|-------|-------|-------|-------|-------|-------|-------|-------|
| CK       | 14.43 | 19.07 | 11.86 | 8.72  | 11.83 | 17.76 | 13.33 | 9.64  | 16.43 | 19.03 | 19.68 | 8.5   |       | 10.4  | 19.71 | 14.64 | 19.98 | 18.58 | 19.16 |
|          | 16.69 | 19.49 |       | 7.78  | 11.47 | 16.76 | 14.76 | 9.41  | 15.48 | 18.12 | 19.57 | 8.14  | 14.2  | 11    |       | 13.88 | 20.65 |       | 20.47 |
|          |       | 18.79 | 11.39 | 7.51  | 11.6  |       | 13.06 |       |       | 20.22 | 19.82 | 7.32  | 14.45 | 10.63 | 18.73 | 13.69 | 21.11 | 19.12 | 20.32 |
| NaCl-3h  | 8.65  | 16.79 | 13.76 | 11.76 | 13.78 | 17.63 | 17.75 | 15.57 | 15.33 |       | 21.44 | 8.71  | 17.82 | 14.16 | 21.17 |       | 19.65 | 17.81 | 19.6  |
|          | 9.3   |       | 13.67 |       | 13.38 | 16.81 | 16.2  | 11.29 | 15.97 | 26.24 | 20.2  | 9.98  | 16.97 | 13.22 | 19.82 | 16.76 | 20.17 |       | 20.54 |
|          | 10.65 | 16.98 | 13.74 | 10.44 | 12.29 | 17.42 | 17.7  |       | 14.21 | 24.99 | 21.72 |       | 15.9  |       |       | 17.84 | 20.36 | 17.86 | 22.63 |
| NaCl-6h  | 9     | 19.73 | 15.8  | 10.26 | 14.47 | 19.06 | 18.34 | 18.66 | 14.85 | 25.68 | 22.67 | 11.92 | 19.13 |       | 20.6  | 19.95 | 20.34 | 19.49 | 21.45 |
|          | 11.04 | 21.2  | 14.3  | 10.96 |       | 18.55 | 15.92 |       | 15.42 | 25.69 | 22.63 | 10.89 |       | 14.75 | 26.21 | 20.31 | 21.72 |       | 21.92 |
|          | 10.54 | 20.65 | 13.81 | 10.77 | 14.37 | 18.49 |       | 16.31 | 14.33 | 24.97 | 21.81 | 12.23 | 17.79 | 14.28 |       |       | 22.67 | 19.21 | 23.24 |
| NaCl-12h | 17.59 | 21.54 |       | 11.74 | 15.54 | 20.69 | 18.57 | 13.69 |       | 25.39 | 21.83 | 12.56 | 17.7  | 10.93 | 22.97 | 20.3  | 24.16 | 21.11 | 22.15 |
|          |       | 21.88 | 15.42 | 12.44 | 15.76 | 19.6  | 17.97 | 16.97 | 17.67 | 24.44 | 21.35 | 11.74 |       | 15.24 | 20.43 | 20.74 | 23.33 | 22.17 | 22.3  |
|          | 16.12 |       | 16.97 |       | 14.29 | 20.6  |       | 20.88 | 15.44 | 24.04 | 21.97 | 10.18 | 17.96 | 18.6  | 23.64 | 20.49 |       | 22.22 | 22.08 |
| NaCl-24h | 14.93 |       | 18.62 | 13.85 | 16.99 |       | 21.78 | 18.34 | 19.67 | 26.7  | 23.25 | 14.54 | 21.65 | 15.95 | 26.36 | 21.21 | 26.8  | 25.4  | 22.89 |
|          | 14.92 | 22.4  |       | 13.63 | 15.92 | 22.25 |       | 17.36 | 21.17 | 26.29 | 24.18 | 14.98 | 20.1  | 23.77 | 27.8  | 22.65 | 24.73 | 23.36 | 22.83 |
|          | 14.94 | 22.75 | 19.32 | 12    |       | 22.79 | 22.72 | 15.46 | 23.33 | 25.6  | 23.71 | 14.82 | 19.95 | 19.15 | 28.36 |       | 25.65 | 24.88 | 22.87 |

qPCR under *Plasmodiophora brassicae* treatment-raw data of three biological repeats

| Sample | TIR1A | TIR1B | TIR1C | TIR1D | TIR1E | TIR1F | AFB1A | AFB1B | AFB1C | AFB1D | AFB2  | AFB3A | AFB3B | AFB3C | AFB3D | AFB4  | AFB5A | AFB5B | ACTIN |
|--------|-------|-------|-------|-------|-------|-------|-------|-------|-------|-------|-------|-------|-------|-------|-------|-------|-------|-------|-------|
| CK     | 21.56 | 18.37 | 18.46 | 7.94  | 13.38 | 18    | 14.34 | 10.86 | 20.97 | 18.21 | 23.36 | 8.71  | 18.16 | 8.73  | 23.76 | 16.53 | 19.55 | 14.76 | 19.96 |
|        | 7.28  | 20.02 | 10.88 | 9.66  | 15.62 | 15.63 | 12.41 | 9.59  | 12.69 | 18.03 | 23.22 | 10.17 | 19.27 | 11.74 | 21.47 | 16.58 | 18.38 | 17.14 | 20.79 |
|        | 16.38 | 19.17 | 11.3  | 8.66  | 11.39 | 16.56 | 14.55 | 13.98 | 12.9  | 11.34 | 23.21 | 7.99  | 18.32 | 14.3  | 22.75 | 17.26 | 15.37 | 17.16 | 20.33 |
| Pb-6h  | 7.43  | 19.72 | 9.56  | 8.72  | 15.32 | 15.63 | 16.76 | 10.45 | 12.18 | 20.18 | 22.71 | 7.72  | 17.68 | 11.81 | 18.95 | 20.39 | 19.16 | 15.36 | 22.3  |
|        | 8.03  | 20.43 | 12.04 | 9.4   | 12.87 | 16.85 | 14.69 | 9.2   | 13.84 | 17.86 | 23.35 | 9.91  | 18.17 | 13.9  | 22.11 | 15.84 | 20.25 | 17.71 | 21.21 |
|        | 8.54  | 19.08 | 12.34 | 7.92  | 8.86  | 16.29 | 16.99 | 9.89  | 4.36  | 16.71 | 22.71 | 9.4   | 15.78 | 9.65  | 22.7  | 17.19 | 20.44 | 18.07 | 24.52 |
| Pb-12h | 8.09  | 19.53 | 11.87 | 9.15  | 10.9  | 16.27 | 14.96 | 18.71 | 14.76 | 19.81 | 19.23 | 9.84  | 17.18 | 11.85 | 18.78 | 18.37 | 18.05 | 15.77 | 21.8  |
|        | 7.86  | 20.87 | 13.5  | 8.66  | 10.96 | 16.5  | 17.03 | 11.35 | 15.7  | 19.45 | 25.46 | 9.34  | 15.79 | 12.12 | 21.67 | 16.94 | 16.57 | 16.6  | 20.17 |
|        | 6.83  | 19.63 | 11.6  | 9.05  | 14.11 | 19.18 | 20.16 | 10.55 | 14.31 | 19.22 | 23.14 | 8.85  | 15.63 | 11.68 | 22.56 | 22.21 | 18.87 | 17.78 | 21.57 |
| Pb-24h | 8.89  | 21.68 | 13.88 | 11.31 | 12.85 | 17.3  | 18.5  | 11.6  | 14.71 | 19.93 | 23.74 | 16.39 | 18.49 | 14.47 | 22.07 | 24.1  | 21.27 | 16.96 | 25.6  |
|        | 10.62 | 21.16 | 15.5  | 11.73 | 14.55 | 18.83 | 15.42 | 11.97 | 15.45 | 21.2  | 24.22 | 10.5  | 18.2  | 13.57 | 23.99 | 21.97 | 21.36 | 16.43 | 21.72 |
|        | 10.57 | 22.23 | 14.19 | 11.38 | 13.73 | 20.99 | 16.99 | 11.8  | 18.09 | 21.22 | 24.62 | 11.75 | 18.63 | 14.54 | 19.94 | 27.5  | 25.46 | 17.23 | 22.8  |
| Pb-48h | 14.42 | 21.89 | 14.25 | 10.36 | 14.83 | 18.96 | 14.93 | 13.48 | 15.91 | 23.44 | 25.93 | 11.61 | 17.71 | 21.28 | 24.27 | 20.01 | 21.92 | 24.31 | 24.5  |
|        | 14.76 | 21.39 | 13.75 | 11.16 | 14.3  | 18.31 | 16.93 | 12.73 | 17.5  | 23.63 | 24.66 | 10.7  | 18.78 | 14.98 | 28.61 | 19.24 | 22.48 | 18.33 | 24.86 |
|        | 9.77  | 22.35 | 12.78 | 10.7  | 16.58 | 21.34 | 19.78 | 12.91 | 12.97 | 22.37 | 24.69 | 12.07 | 19.39 | 16.88 | 22.21 | 19.6  | 21.84 | 20.03 | 25.48 |
| Pb-72h | 19.2  | 24.4  | 14.64 | 14.44 | 18.61 | 18.53 | 21.78 | 18.99 | 18.59 | 28.23 | 25.49 | 15.4  | 16.94 | 19.85 | 23.35 | 22.29 | 24.83 | 22.68 | 24.11 |
|        | 12.71 | 24.62 | 14.42 | 13.47 | 14.14 | 21.97 | 21.46 | 18.77 | 19.85 | 23.96 | 24.6  | 15.03 | 16.42 | 20.7  | 26.29 | 22.6  | 25.56 | 18.63 | 24.87 |
|        | 13.38 | 22.49 | 19.44 | 16.16 | 24.12 | 19.73 | 18.37 | 14.96 | 17.81 | 25.11 | 24.85 | 16.2  | 18.85 | 17.9  | 26.64 | 22.71 | 20.35 | 19.87 | 24.37 |

qPCR under *Plasmodiophora brassicae* treatment-modified data used for analysis

| Sample | TIR1A | TIR1B | TIR1C | TIR1D | TIR1E | TIR1F | AFB1A | AFB1B | AFB1C | AFB1D | AFB2  | AFB3A | AFB3B | AFB3C | AFB3D | AFB4  | AFB5A | AFB5B | ACTIN |
|--------|-------|-------|-------|-------|-------|-------|-------|-------|-------|-------|-------|-------|-------|-------|-------|-------|-------|-------|-------|
| CK     | 21.56 | 18.37 |       | 7.94  | 13.38 |       | 14.34 | 10.86 |       | 18.21 | 23.36 | 8.71  | 18.16 | 8.73  | 23.76 | 16.53 | 19.55 |       | 19.96 |
|        |       | 20.02 | 10.88 | 9.66  | 15.62 | 15.63 |       | 9.59  | 12.69 | 18.03 | 23.22 |       | 19.27 | 11.74 | 21.47 | 16.58 | 18.38 | 17.14 | 20.79 |
|        | 16.38 | 19.17 | 11.3  | 8.66  | 11.39 | 16.56 | 14.55 |       | 12.9  |       | 23.21 | 7.99  | 18.32 | 14.3  | 22.75 | 17.26 |       | 17.16 | 20.33 |
| Pb-6h  | 7.43  | 19.72 |       | 8.72  | 15.32 | 15.63 | 16.76 | 10.45 | 12.18 |       | 22.71 |       | 17.68 | 11.81 |       |       | 19.16 |       | 22.3  |
|        | 8.03  | 20.43 | 12.04 | 9.4   | 12.87 | 16.85 |       | 9.2   | 13.84 | 17.86 | 23.35 | 9.91  | 18.17 | 13.9  | 22.11 | 15.84 | 20.25 | 17.71 | 21.21 |
|        | 8.54  | 19.08 | 12.34 | 7.92  |       | 16.29 | 16.99 | 9.89  |       | 16.71 | 22.71 | 9.4   |       |       | 22.7  | 17.19 | 20.44 | 18.07 | 24.52 |
| Pb-12h | 8.09  | 19.53 | 11.87 | 9.15  | 10.9  | 16.27 | 14.96 |       | 14.76 | 19.81 |       | 9.84  |       | 11.85 |       | 18.37 | 18.05 | 15.77 | 21.8  |
|        | 7.86  | 20.87 |       | 8.66  | 10.96 | 16.5  | 17.03 | 11.35 | 15.7  | 19.45 | 25.46 | 9.34  | 15.79 | 12.12 | 21.67 | 16.94 |       | 16.6  | 20.17 |
|        | 6.83  | 19.63 | 11.6  | 9.05  |       |       | 20.16 | 10.55 | 14.31 | 19.22 | 23.14 | 8.85  | 15.63 | 11.68 | 22.56 |       | 18.87 | 17.78 | 21.57 |
| Pb-24h |       | 21.68 | 13.88 | 11.31 | 12.85 | 17.3  |       | 11.6  | 14.71 |       | 23.74 |       | 18.49 | 14.47 | 22.07 | 24.1  | 21.27 | 16.96 | 25.6  |
|        | 10.62 | 21.16 | 15.5  | 11.73 | 14.55 | 18.83 | 15.42 | 11.97 | 15.45 | 21.2  | 24.22 | 10.5  | 18.2  | 13.57 | 23.99 | 21.97 | 21.36 | 16.43 | 21.72 |
|        | 10.57 | 22.23 | 14.19 | 11.38 | 13.73 |       | 16.99 | 11.8  |       | 21.22 | 24.62 | 11.75 | 18.63 | 14.54 |       | 27.5  |       | 17.23 | 22.8  |
| Pb-48h | 14.42 | 21.89 | 14.25 | 10.36 | 14.83 | 18.96 | 14.93 | 13.48 | 15.91 | 23.44 | 25.93 | 11.61 | 17.71 |       | 24.27 | 20.01 | 21.92 |       | 24.5  |
|        | 14.76 | 21.39 | 13.75 | 11.16 | 14.3  | 18.31 | 16.93 | 12.73 | 17.5  | 23.63 | 24.66 | 10.7  | 18.78 | 14.98 |       | 19.24 | 22.48 | 18.33 | 24.86 |
|        |       | 22.35 | 12.78 | 10.7  |       |       |       | 12.91 |       | 22.37 | 24.69 | 12.07 | 19.39 | 16.88 | 22.21 | 19.6  | 21.84 | 20.03 | 25.48 |
| Pb-72h |       | 24.4  | 14.64 | 14.44 | 18.61 | 18.53 | 21.78 | 18.99 | 18.59 |       | 25.49 | 15.4  | 16.94 | 19.85 |       | 22.29 | 24.83 |       | 24.11 |
|        | 12.71 | 24.62 | 14.42 | 13.47 | 14.14 |       | 21.46 | 18.77 | 19.85 | 23.96 | 24.6  | 15.03 | 16.42 | 20.7  | 26.29 | 22.6  | 25.56 | 18.63 | 24.87 |
|        | 13.38 | 22.49 |       |       |       | 19.73 |       |       | 17.81 | 25.11 | 24.85 | 16.2  |       |       | 26.64 | 22.71 |       | 19.87 | 24.37 |
